# Supplementary material for: Impact of a health education intervention on knowledge, attitudes, and use of visibility materials among commercial motorcycle riders: a quasi-experimental study in Cameroon
Source: Research Square preprint supplement (doi:10.21203/rs.3.rs-9163081/v1), 2026-03-27
Supplement: Supplementary file 1 [file 25aef2fc1c7f78f56cddfd06.docx]

**Supplementary Information**

**Additional file 1:** Structured questionnaire used for data collection (English version).
